# Supplementary material
Source: PubMed Central journal article supplement (PMC4818712)
Supplement: NIHMS766810-supplement-2.pdf [file NIHMS766810-supplement-2.pdf]

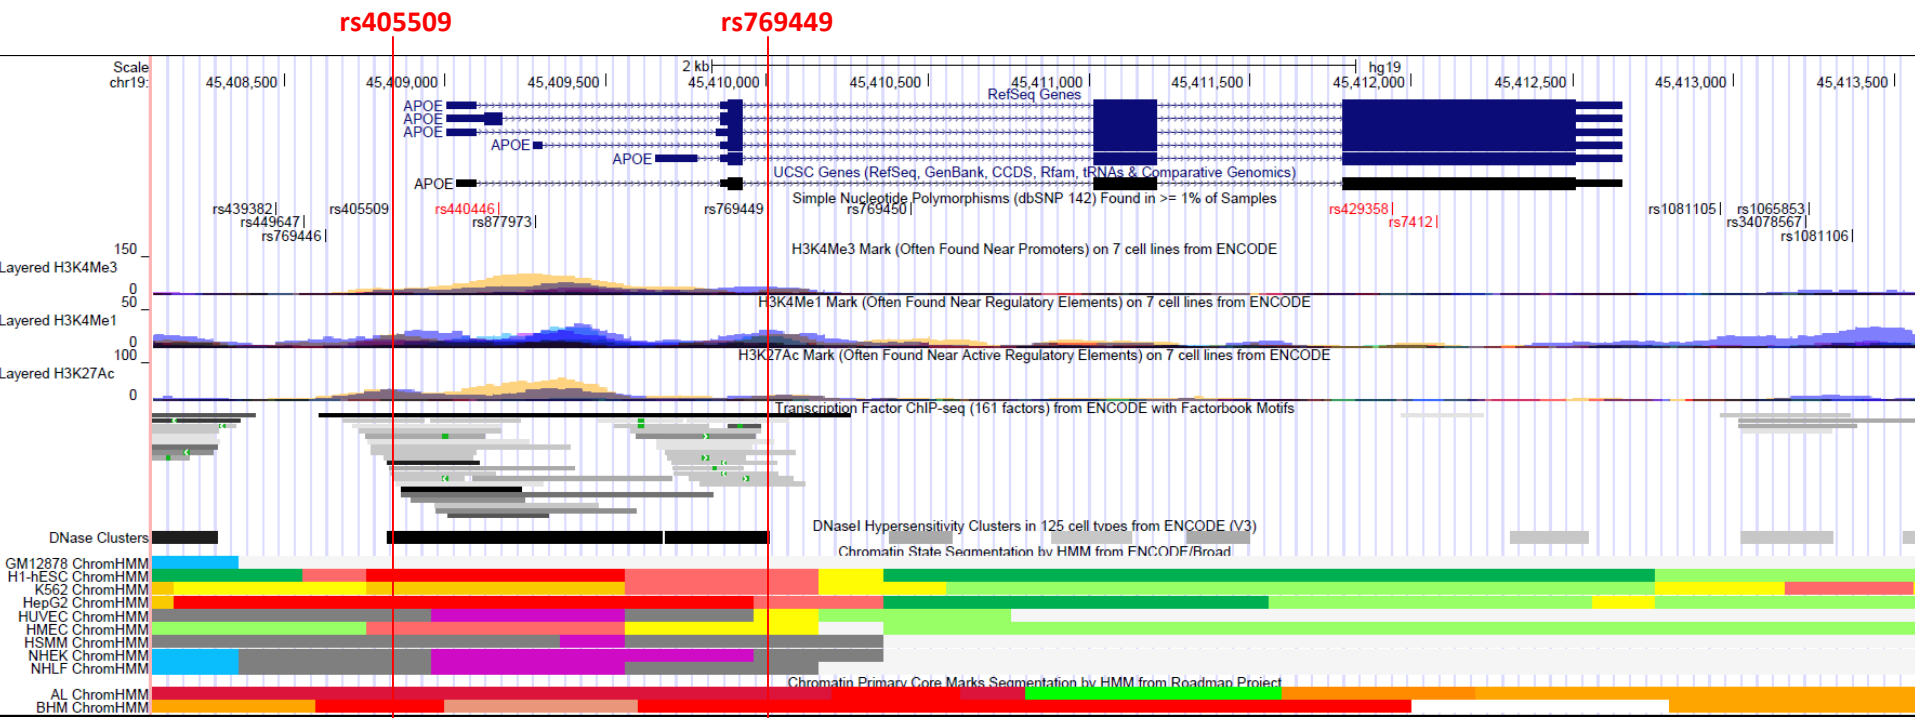

GM12878: B-lymphocyte  
 H1-hESC: embryonic stem cell  
 K562: leukemia cell  
 HepG2: hepatocellular carcinoma cell  
 HUVEC: umbilical vein endothelial cells  
 HMEC: mammary epithelial cells  
 HSMM: skeletal muscle myoblasts  
 NHEK: epidermal keratinocytes  
 NHLF: lung fibroblasts  
 AL: Adult Liver  
 BHM: Brain Hippocampus Middle

### Chromatin State Segmentation by HMM from ENCODE/Broad

- **Bright Red** - Active Promoter
- **Light Red** - Weak Promoter
- **Purple** - Inactive/poised Promoter
- **Orange** - Strong enhancer
- **Orange** - Strong enhancer
- **Yellow** - Weak/poised enhancer
- **Yellow** - Weak/poised enhancer
- **Blue** - Insulator
- **Dark Green** - Transcriptional transition
- **Dark Green** - Transcriptional elongation
- **Light Green** - Weak transcribed
- **Gray** - Polycomb-repressed
- **Light Gray** - Heterochromatin; low signal
- **Light Gray** - Repetitive/Copy Number Variation
- **Light Gray** - Repetitive/Copy Number Variation

### Chromatin Primary Core Marks Segmentation by HMM from Roadmap Project

- **Red** - TssA (Active\_TSS)
- **OrangeRed** - TssAFlnk (Flanking\_Active\_TSS)
- **LimeGreen** - TxFlnk (Transcr\_at\_gene\_5\_and\_3primer)
- **Green** - Tx (Strong\_transcription)
- **DarkGreen** - TxWk (Weak\_transcription)
- **GreenYellow** - EnhG (Genic\_enhancers)
- **Yellow** - Enh (Enhancers)
- **MediumAquamarine** - ZNF/Rpts (ZNF\_genes&repeats)
- **PaleTurquoise** - Het (Heterochromatin)
- **IndianRed** - TssBiv (Bivalent/Poised\_TSS)
- **DarkSalmon** - BivFlnk (Flanking\_Bivalent\_TSS/Enh)
- **DarkKhaki** - EnhBiv (Bivalent\_Enhancer)
- **Silver** - ReprPC (Repressed\_PolyComb)
- **Gainsboro** - ReprPCWk (Weak\_Repressed\_PolyComb)
- **White** - Quies (Quiescent/Low)
