# Supplementary material
Source: PubMed Central journal article supplement (PMC4818712)

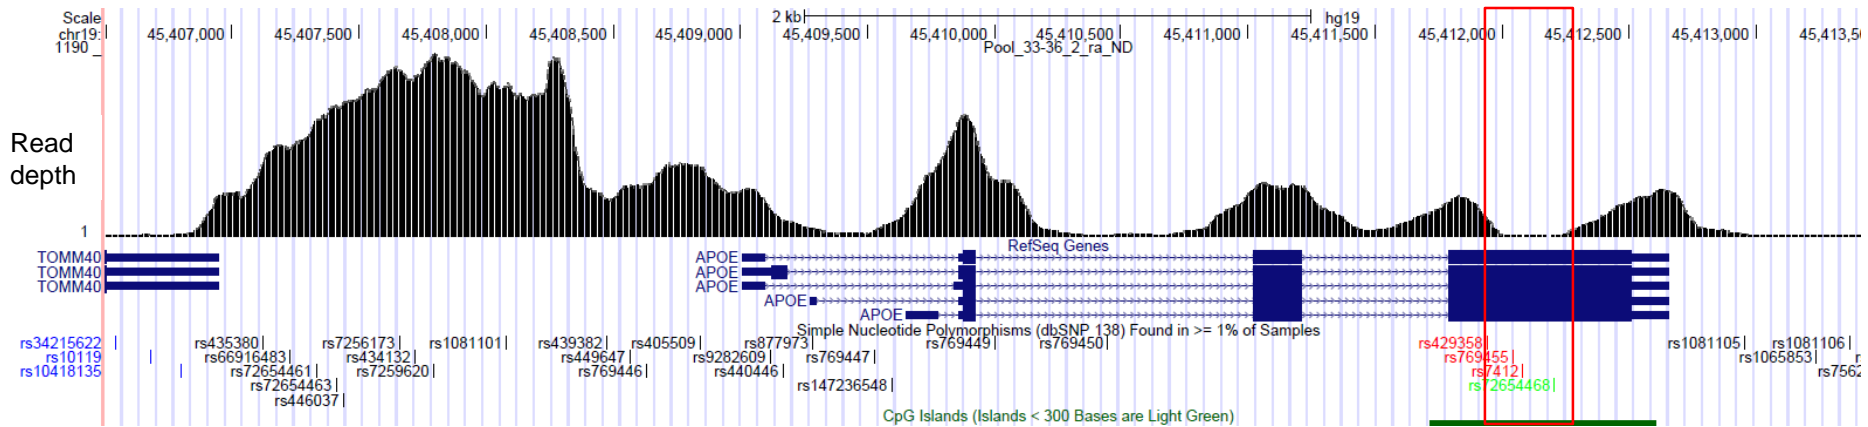

Supplement: NIHMS766810-supplement-1.pdf [file NIHMS766810-supplement-1.pdf]
